# Supplementary material for: Comparison and Identification for Rhizomes and Leaves of Paris yunnanensis Based on Fourier Transform Mid-Infrared Spectroscopy Combined with Chemometrics
Source: PubMed Central journal article supplement (PMC6320853; doi:10.3390/molecules23123343), 2018-12-17
Supplement: molecules-23-03343-s001.pdf [file molecules-23-03343-s001.pdf]

**Comparison and identification for rhizomes and leaves of *Paris yunnanensis* based on Fourier transform mid infrared spectroscopy combined with chemometrics**

Yi-Fei Pei <sup>a, b</sup>, Qing-Zhi Zhang <sup>b</sup>, Zhi-Tian Zuo <sup>a\*</sup> and Yuan-Zhong Wang <sup>a\*</sup>

<sup>a</sup> Institute of Medicinal Plants, Yunnan Academy of Agricultural Sciences, Kunming 650200, PR China.

<sup>b</sup> College of Traditional Chinese Medicine, Yunnan University of Traditional Chinese Medicine, Kunming 650500, PR China.

\*Corresponding author:

**Mr Yuan-Zhong Wang** and **Mrs Zhi-Tian Zuo**, Institute of Medicine Plants, Yunnan Academy of Agricultural Science, 2238, Beijing Road, Panlong District, Kunming 650200, China. Tel: +86 871-65033575, Fax: +86 871-65033441, E-mail: boletus@126.com (**Mr Yuan-Zhong Wang**), yaaszztian@126.com (**Mrs Zhi-Tian Zuo**)

## Figure captions

Fig. S1 VIP scores of FT-MIR data of leaves for regional difference: (a) raw dataset, (b) SNV-SD dataset.

Fig. S2 The  $n_{\text{tree}}$  and  $m_{\text{try}}$  screening of RF models of *P. yunnanensis* samples before variables ranked by permutation accuracy importance: (a)  $n_{\text{tree}}$  of raw leaves dataset, (b)  $n_{\text{tree}}$  of SNV-SD leaves dataset, (c)  $m_{\text{try}}$  of raw leaves dataset, (d)  $m_{\text{try}}$  of SNV-SD leaves dataset.

Fig. S3 The 10-fold cross validation error rates of RF model (sequentially reduce each five variables) based on *P. yunnanensis* samples: (a) raw leaves dataset, (b) SNV-SD leaves dataset.

Fig. S4 The  $n_{\text{tree}}$  and  $m_{\text{try}}$  screening of RF models of *P. yunnanensis* samples after variables ranked by permutation accuracy importance: (a)  $n_{\text{tree}}$  of raw leaves dataset, (b)  $n_{\text{tree}}$  of SNV-SD leaves dataset, (c)  $m_{\text{try}}$  of raw leaves dataset, (d)  $m_{\text{try}}$  of SNV-SD leaves dataset.

Fig. S5 The  $n_{\text{tree}}$  and  $m_{\text{try}}$  screening of RF models of *P. yunnanensis* samples before variables ranked by permutation accuracy importance: (a)  $n_{\text{tree}}$  of raw data fusion dataset, (b)  $n_{\text{tree}}$  of SNV-SD data fusion dataset, (c)  $m_{\text{try}}$  of raw data fusion dataset, (d)  $m_{\text{try}}$  of SNV-SD data fusion dataset.

Fig. S6 The 10-fold cross validation error rates of RF model (sequentially reduce each five variables) based on *P. yunnanensis* samples: (a) raw data fusion dataset, (b) SNV-SD data fusion dataset.

Fig. S7 The  $n_{\text{tree}}$  and  $m_{\text{try}}$  screening of RF models of *P. yunnanensis* samples after variables ranked by permutation accuracy importance: (a)  $n_{\text{tree}}$  of raw data fusion dataset, (b)  $n_{\text{tree}}$  of SNV-SD data fusion dataset, (c)  $m_{\text{try}}$  of raw data fusion dataset, (d)  $m_{\text{try}}$  of SNV-SD data fusion dataset.

## Table captions

Table S1 The major parameters of raw and preprocessing **calibration** models based on *P. yunnanensis* samples combined with rhizomes FT-MIR spectra.

Table S2 The major parameters of PLS-DA and RF models of each class based on raw and SNV-SD rhizomes FT-MIR spectra datasets of *P. yunnanensis* samples.

Table S3 The major parameters of raw and preprocessing **calibration** models based on *P. yunnanensis* samples combined with leaves FT-MIR spectra.

Table S4 The major parameters of PLS-DA and RF models of each class based on raw and SNV-SD leave FT-MIR spectra datasets of *P. yunnanensis* samples.

**Table S5 The geographical location of *P. yunnanensis* samples.**

**Table S6 The sample size of calibration set and validation set for each class.**

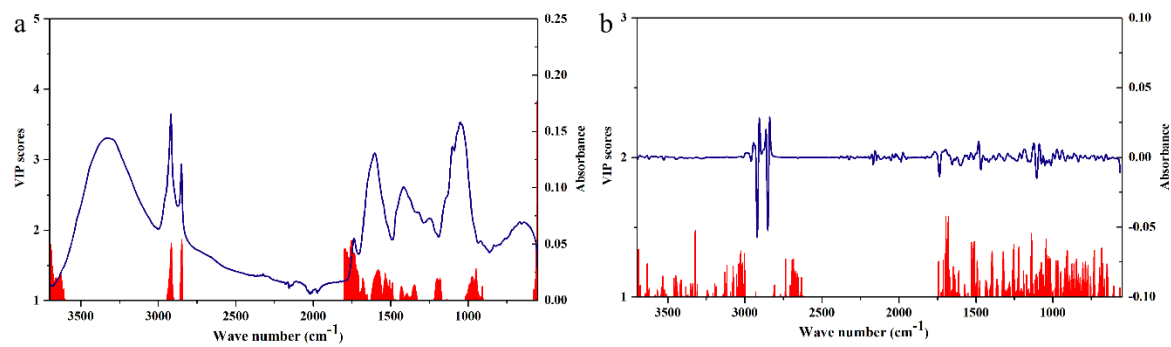

Fig. S1

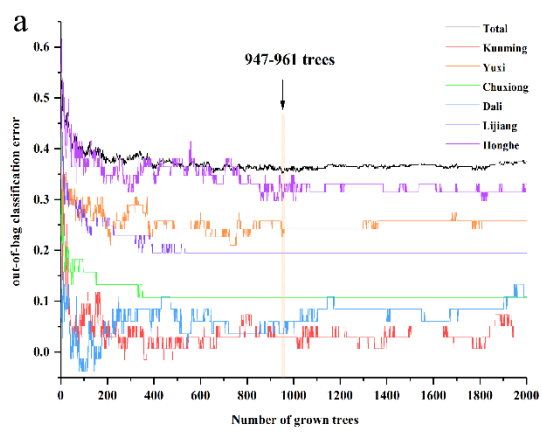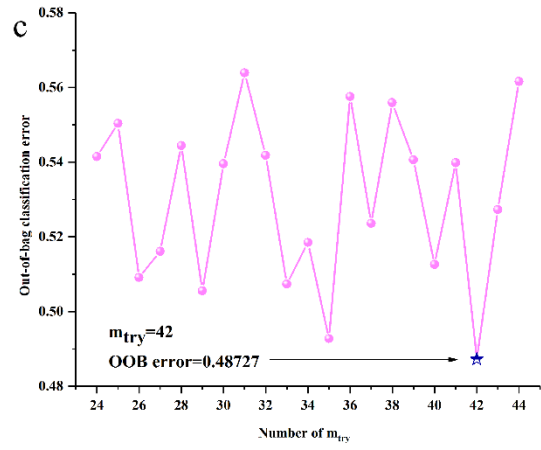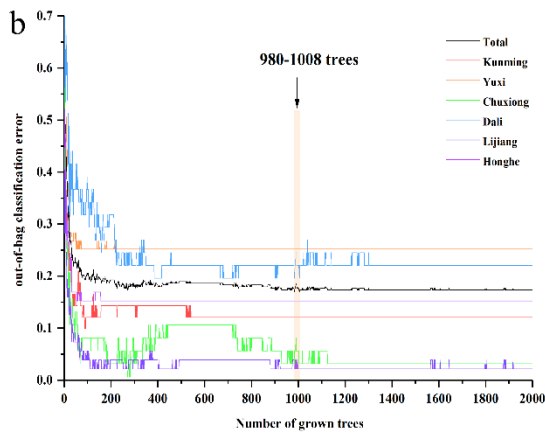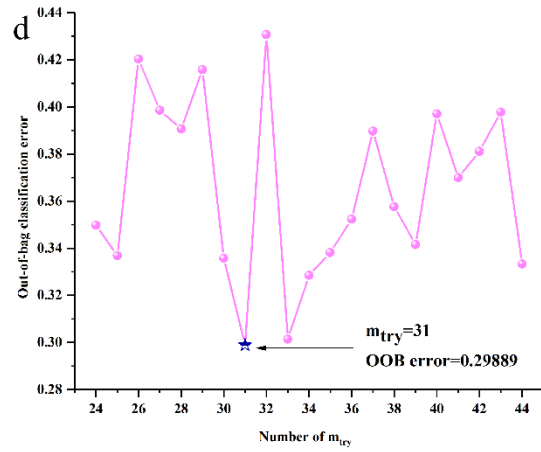

Fig. S2

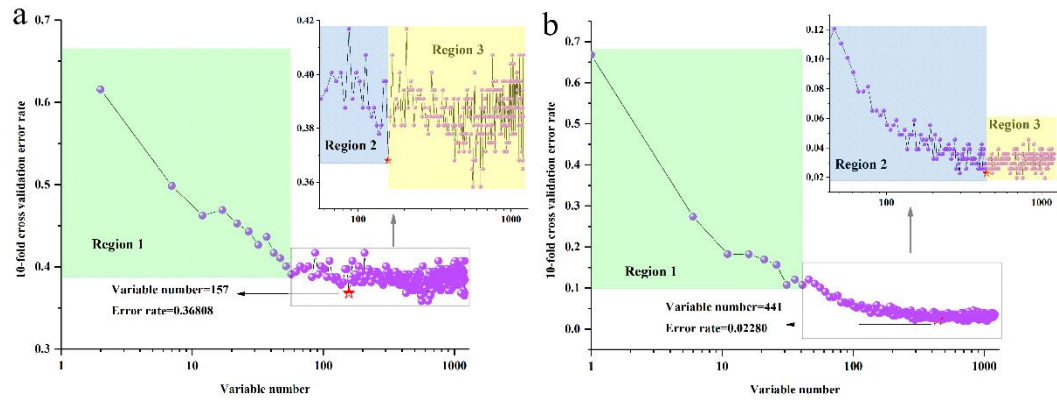

Fig. S3

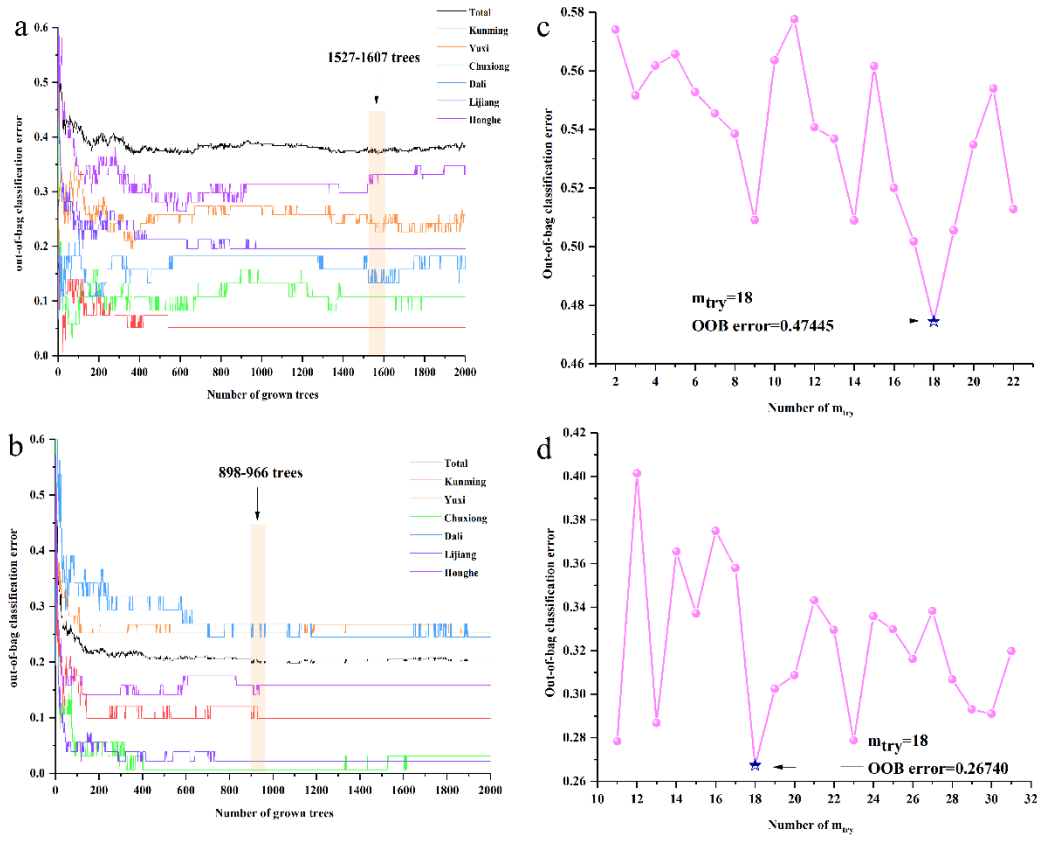

Fig. S4

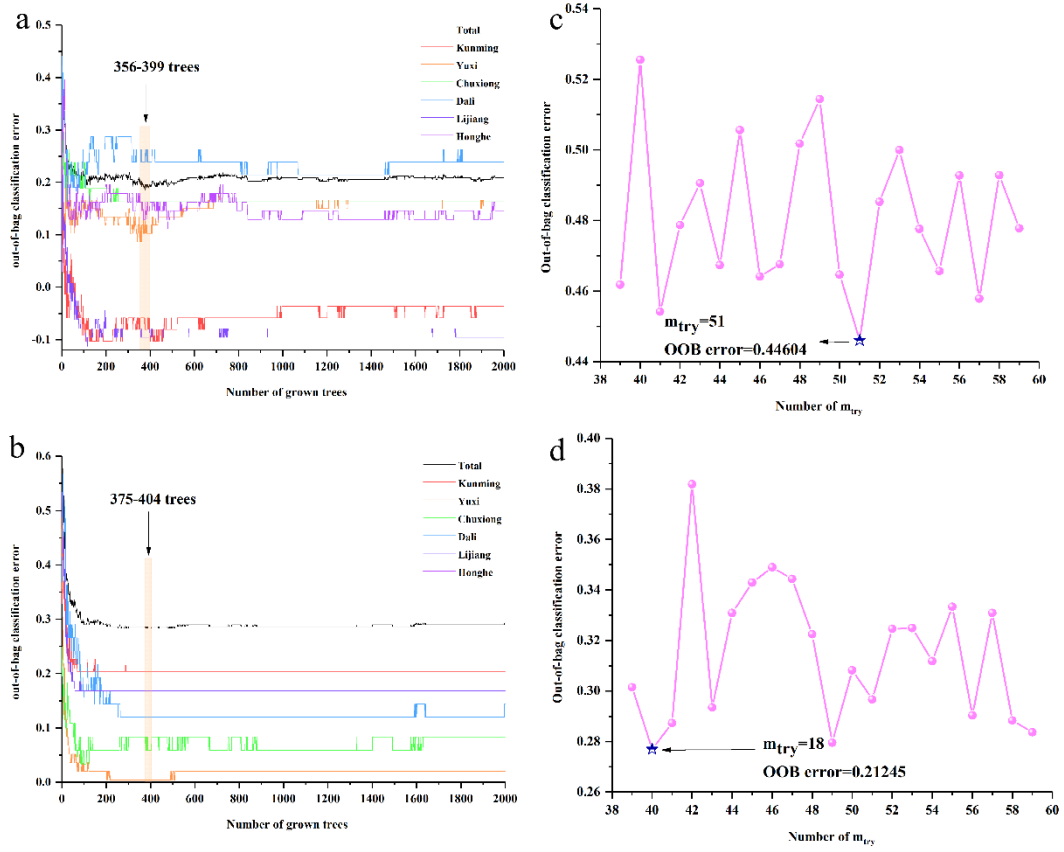

Fig. S5



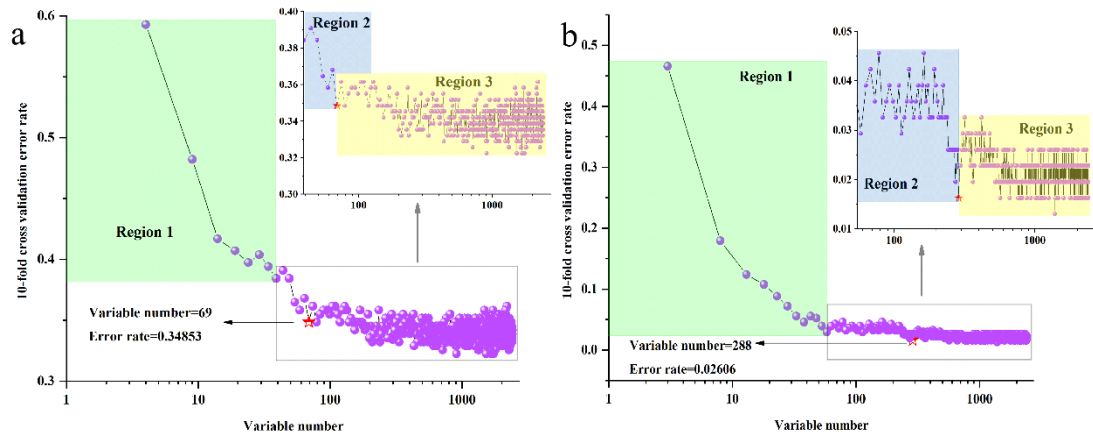

Fig. S6

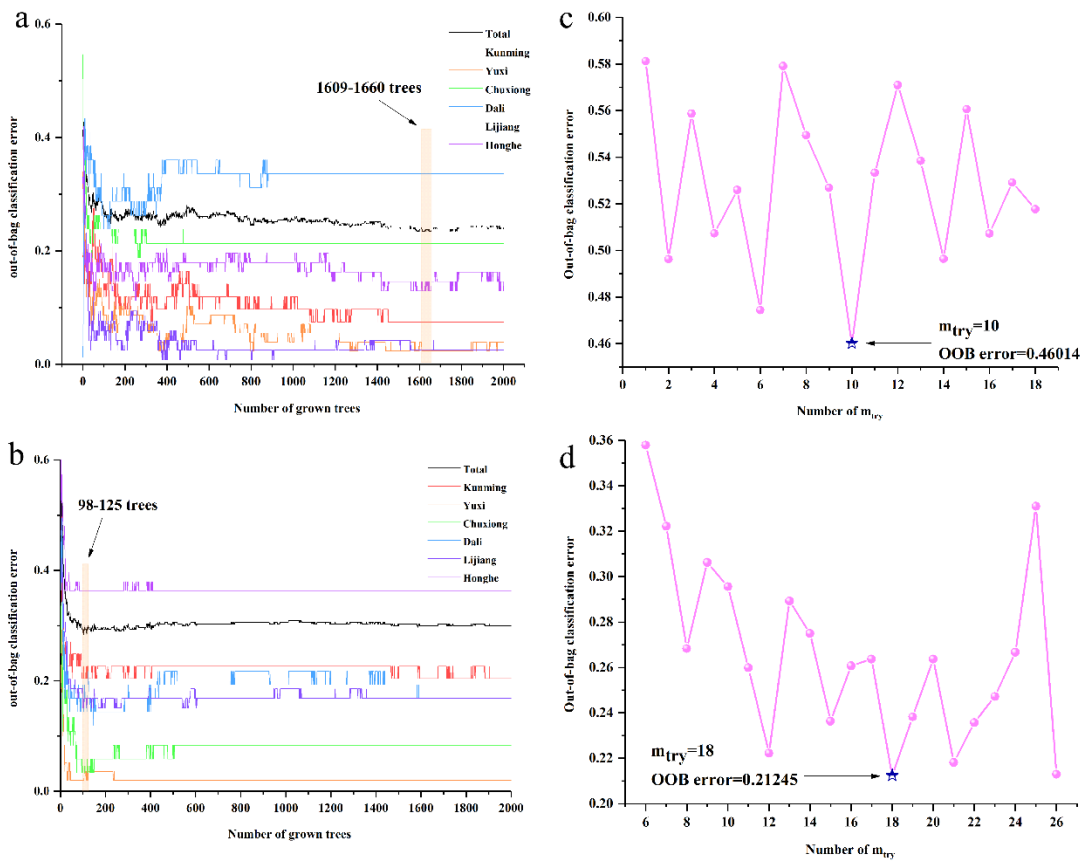

Fig. S7

Table S1

| Preprocessing | LVs | R <sup>2</sup> | Q <sup>2</sup> | RMSEE    | RMSECV   | Accuracy |
|---------------|-----|----------------|----------------|----------|----------|----------|
| Raw           | 18  | 0.714          | 0.584          | 0.201239 | 0.250368 | 95.44%   |
| SNV           | 18  | 0.696          | 0.56           | 0.208316 | 0.254995 | 95.77%   |
| SNV-FD        | 19  | 0.775          | 0.614          | 0.179515 | 0.239488 | 99.02%   |
| SNV-SD        | 14  | 0.816          | 0.674          | 0.162205 | 0.219739 | 99.67%   |
| SD            | 16  | 0.824          | 0.63           | 0.174812 | 0.237413 | 100%     |

Table S2

| Preprocessing | Set         | Classes <sup>a</sup> | PLS-DA |       |       |       | RF     |       |       |       |
|---------------|-------------|----------------------|--------|-------|-------|-------|--------|-------|-------|-------|
|               |             |                      | SENS   | SPEC  | ACC   | MCC   | SENS   | SPEC  | ACC   | MCC   |
| Raw           | Calibration | 1                    | 1      | 1     | 1     | 1     | 0.6    | 0.962 | 0.909 | 0.61  |
|               |             | 2                    | 0.968  | 0.992 | 0.987 | 0.96  | 0.698  | 0.955 | 0.902 | 0.688 |
|               |             | 3                    | 0.775  | 1     | 0.971 | 0.866 | 0.625  | 0.974 | 0.928 | 0.66  |
|               |             | 4                    | 0.927  | 0.992 | 0.984 | 0.929 | 0.561  | 0.951 | 0.899 | 0.541 |
|               |             | 5                    | 1      | 0.972 | 0.977 | 0.931 | 0.69   | 0.9   | 0.86  | 0.565 |
|               |             | 6                    | 1      | 0.988 | 0.99  | 0.97  | 0.764  | 0.861 | 0.844 | 0.553 |
|               | Validation  | 1                    | 1      | 0.992 | 0.994 | 0.975 | 0.87   | 0.977 | 0.961 | 0.847 |
|               |             | 2                    | 0.75   | 0.992 | 0.942 | 0.816 | 0.469  | 1     | 0.89  | 0.642 |
|               |             | 3                    | 0.619  | 1     | 0.948 | 0.764 | 0.238  | 1     | 0.897 | 0.461 |
|               |             | 4                    | 0.95   | 1     | 0.994 | 0.971 | 0.8    | 1     | 0.974 | 0.881 |
|               |             | 5                    | 1      | 0.937 | 0.948 | 0.857 | 0.931  | 0.849 | 0.865 | 0.666 |
|               |             | 6                    | 1      | 0.944 | 0.955 | 0.875 | 0.9333 | 0.824 | 0.845 | 0.64  |
| SNV-SD        | Calibration | 1                    | 1      | 1     | 1     | 1     | 0.933  | 0.992 | 0.984 | 0.934 |
|               |             | 2                    | 1      | 1     | 1     | 1     | 0.921  | 0.996 | 0.98  | 0.939 |
|               |             | 3                    | 0.975  | 1     | 0.997 | 0.986 | 0.8    | 0.989 | 0.964 | 0.835 |
|               |             | 4                    | 1      | 1     | 1     | 1     | 0.854  | 0.981 | 0.964 | 0.844 |
|               |             | 5                    | 1      | 0.996 | 0.997 | 0.989 | 0.897  | 0.948 | 0.938 | 0.809 |
|               |             | 6                    | 1      | 1     | 1     | 1     | 0.967  | 0.976 | 0.974 | 0.92  |
|               | Validation  | 1                    | 1      | 1     | 1     | 1     | 1      | 1     | 1     | 1     |
|               |             | 2                    | 1      | 1     | 1     | 1     | 0.969  | 1     | 0.994 | 0.98  |
|               |             | 3                    | 0.905  | 1     | 0.987 | 0.944 | 0.905  | 1     | 0.987 | 0.944 |
|               |             | 4                    | 1      | 0.993 | 0.994 | 0.972 | 0.85   | 0.993 | 0.974 | 0.882 |
|               |             | 5                    | 1      | 1     | 1     | 1     | 0.966  | 0.96  | 0.961 | 0.882 |
|               |             | 6                    | 1      | 0.992 | 0.994 | 0.98  | 1      | 0.992 | 0.994 | 0.98  |

Table S3

| Preprocessing | LVs | R <sup>2</sup> | Q <sup>2</sup> | RMSEE    | RMSECV   | Accuracy |
|---------------|-----|----------------|----------------|----------|----------|----------|
| Raw           | 18  | 0.698          | 0.559          | 0.203855 | 0.203855 | 95.77%   |
| SNV           | 17  | 0.719          | 0.549          | 0.198488 | 0.256876 | 97.72%   |
| SNV-FD        | 17  | 0.807          | 0.622          | 0.165141 | 0.240036 | 100%     |
| SNV-SD        | 15  | 0.876          | 0.754          | 0.133634 | 0.195234 | 100%     |
| SD            | 14  | 0.837          | 0.704          | 0.151242 | 0.210209 | 99.67%   |



Table S5

| Region | Location         | Sample size | Latitude (°N) | Longitude (°E) |
|--------|------------------|-------------|---------------|----------------|
| 1      | Wuhua, Kunming   | 68          | 25.042165     | 102.704412     |
| 2      | Hongta, Yuxi     | 95          | 24.43105      | 102.44098      |
| 3      | Yaoan, Chuxiong  | 61          | 25.522293     | 101.375931     |
| 4      | Weishan, Dali    | 61          | 25.307049     | 100.316085     |
| 5      | Gucheng, Lijiang | 87          | 26.874046     | 100.190409     |
| 6      | Yuanyang, Honghe | 90          | 23.007286     | 103.025416     |

Table S6

|                 | Class 1 | Class 2 | Class 3 | Class 4 | Class 5 | Class 6 |
|-----------------|---------|---------|---------|---------|---------|---------|
| Calibration set | 45      | 63      | 40      | 41      | 58      | 60      |
| Validation set  | 23      | 32      | 21      | 20      | 29      | 30      |
| Total           | 68      | 95      | 61      | 61      | 87      | 90      |
